# Supplementary material
Source: MDPI journal article supplement (https://www.mdpi.com/2073-4441/15/1/103)
Supplement: s1 [file s1]

*Supplementary Material*

# Machine Learning Approach for Rapid Estimation of Five-Day Biochemical Oxygen Demand in Wastewater

Panagiotis G. Asteris <sup>1</sup>, Dimitrios E. Alexakis <sup>2,\*</sup>, Markos Z. Tsoukalas <sup>1</sup>, Dimitra E. Gamvroula <sup>1</sup> and Deniz Guney <sup>3</sup>

<sup>1</sup> Computational Mechanics Laboratory, School of Pedagogical and Technological Education, Heraklion, GR 15122 Athens, Greece

<sup>2</sup> Laboratory of Geoenvironmental Science and Environmental Quality Assurance, Department of Civil Engineering, School of Engineering, University of West Attica, GR 12241 Athens, Greece

<sup>3</sup> Engineering Faculty, San Diego State University, San Diego 92182 USA

\* Correspondence: d.alexakis@uniwa.gr; Tel.: +30-210-538-1256

**Table S1.** Experimental database used for the training, testing and development of ANN models.

| Nr | Input Parameters    |                    |                    |                          |                    | Output Parameter           |
|----|---------------------|--------------------|--------------------|--------------------------|--------------------|----------------------------|
|    | Chemical Oxygen De- | Suspended          | Total Nitro-       | Ammonia Nitro-           | Total Phospho-     | Biochemical Oxygen         |
|    | mand (COD)          | Solids (SS)        | gen (TN)           | gen (NH <sub>4</sub> -N) | rous (TP)          | Demand (BOD <sub>5</sub> ) |
|    | mg L <sup>-1</sup>  | mg L <sup>-1</sup> | mg L <sup>-1</sup> | mg L <sup>-1</sup>       | mg L <sup>-1</sup> | mg L <sup>-1</sup>         |
| 1  | 424                 | 228                | 67.7               | 57.3                     | 5.6                | 271                        |
| 2  | 433                 | 214                | 68.4               | 58.3                     | 5.81               | 287                        |
| 3  | 493                 | 279                | 75.3               | 64.2                     | 6.51               | 318                        |
| 4  | 538                 | 288                | 78.5               | 68.9                     | 6.81               | 334                        |
| 5  | 521                 | 251                | 78.3               | 66.8                     | 6.74               | 335                        |
| 6  | 535                 | 281                | 78.5               | 69.2                     | 6.88               | 347                        |
| 7  | 532                 | 267                | 78.1               | 68.2                     | 6.89               | 345                        |
| 8  | 529                 | 228                | 78.6               | 67.7                     | 6.86               | 341                        |
| 9  | 541                 | 295                | 79.7               | 70.1                     | 6.95               | 348                        |
| 10 | 530                 | 269                | 78.5               | 68.3                     | 6.88               | 339                        |
| 11 | 525                 | 277                | 78.6               | 67.9                     | 6.85               | 341                        |
| 12 | 515                 | 267                | 76.8               | 66.3                     | 6.75               | 318                        |
| 13 | 512                 | 257                | 77.1               | 65.8                     | 6.69               | 320                        |
| 14 | 523                 | 285                | 78.2               | 67.5                     | 6.8                | 339                        |
| 15 | 515                 | 293                | 76.9               | 66.7                     | 6.61               | 319                        |
| 16 | 517                 | 254                | 76.2               | 67.2                     | 6.67               | 325                        |
| 17 | 479                 | 227                | 74.1               | 63.3                     | 6.45               | 313                        |
| 18 | 489                 | 266                | 75.1               | 65                       | 6.52               | 324                        |
| 19 | 493                 | 285                | 75.3               | 66.1                     | 6.55               | 327                        |
| 20 | 490                 | 274                | 75.1               | 64.8                     | 6.49               | 321                        |
| 21 | 481                 | 280                | 74.6               | 63.7                     | 6.42               | 312                        |
| 22 | 435                 | 244                | 70.2               | 58.3                     | 5.89               | 288                        |
| 23 | 431                 | 250                | 69.1               | 57.9                     | 5.84               | 285                        |
| 24 | 422                 | 212                | 67.5               | 57                       | 5.65               | 273                        |
| 25 | 337                 | 223                | 57.1               | 47.1                     | 4.78               | 221                        |
| 26 | 297                 | 215                | 52.8               | 43.5                     | 4.31               | 197                        |
| 27 | 352                 | 233                | 59.6               | 50.5                     | 4.95               | 238                        |
| 28 | 410                 | 255                | 66.3               | 56.5                     | 5.62               | 270                        |
| 29 | 324                 | 217                | 55.8               | 45.8                     | 4.61               | 216                        |
| 30 | 342                 | 230                | 58.9               | 49.1                     | 4.89               | 231                        |
| 31 | 413                 | 257                | 67.2               | 57.4                     | 5.62               | 277                        |
| 32 | 277                 | 215                | 52.9               | 42.9                     | 4.38               | 198                        |
| 33 | 328                 | 222                | 56.1               | 45.8                     | 4.65               | 215                        |
| 34 | 340                 | 230                | 58.9               | 49.1                     | 4.89               | 231                        |
| 35 | 348                 | 238                | 60.2               | 50.2                     | 4.98               | 234                        |
| 36 | 319                 | 215                | 54.6               | 44.2                     | 4.51               | 204                        |
| 37 | 327                 | 219                | 55.3               | 45.2                     | 4.59               | 212                        |
| 38 | 281                 | 211                | 53.1               | 42.2                     | 4.31               | 199                        |
| 39 | 270                 | 209                | 51.8               | 41.4                     | 4.18               | 186                        |
| 40 | 334                 | 225                | 57.5               | 47.5                     | 4.75               | 223                        |
| 41 | 315                 | 220                | 55.9               | 46.2                     | 4.51               | 204                        |
| 42 | 278                 | 213                | 52.4               | 42                       | 4.23               | 197                        |
| 43 | 340                 | 230                | 56                 | 48.4                     | 4.82               | 220                        |
| 44 | 279                 | 212                | 54                 | 42.6                     | 4.17               | 195                        |

|    |     |     |      |      |      |     |
|----|-----|-----|------|------|------|-----|
| 45 | 285 | 218 | 55   | 43.1 | 4.26 | 208 |
| 46 | 274 | 208 | 52   | 42.2 | 4.12 | 190 |
| 47 | 268 | 204 | 51   | 41.3 | 4.11 | 180 |
| 48 | 321 | 220 | 59   | 45.6 | 4.54 | 230 |
| 49 | 413 | 244 | 63.4 | 53   | 5.09 | 255 |
| 50 | 490 | 265 | 70.5 | 60.4 | 6.14 | 307 |
| 51 | 400 | 210 | 64.9 | 57.9 | 4.93 | 205 |
| 52 | 414 | 215 | 63.5 | 56.7 | 5.11 | 218 |
| 53 | 395 | 208 | 60.9 | 58.6 | 4.96 | 210 |
| 54 | 408 | 197 | 62.8 | 55.1 | 4.84 | 201 |
| 55 | 400 | 203 | 59.7 | 51.3 | 4.09 | 187 |
| 56 | 386 | 216 | 62.2 | 52.4 | 4.17 | 200 |
| 57 | 415 | 207 | 60.4 | 49   | 3.98 | 209 |
| 58 | 402 | 214 | 58.8 | 50.5 | 4.01 | 198 |
| 59 | 405 | 239 | 64.2 | 57.4 | 4.59 | 218 |
| 60 | 390 | 255 | 68.5 | 60.1 | 4.63 | 196 |
| 61 | 400 | 274 | 66.8 | 54.7 | 4.25 | 201 |
| 62 | 410 | 242 | 65.7 | 52.5 | 4.41 | 185 |
| 63 | 354 | 209 | 53.8 | 48.5 | 4.81 | 192 |
| 64 | 387 | 211 | 55.6 | 50.6 | 4.6  | 210 |
| 65 | 364 | 219 | 56.2 | 49.4 | 4.58 | 234 |
| 66 | 310 | 204 | 52.4 | 45.6 | 4.21 | 214 |
| 67 | 305 | 201 | 53.9 | 41.6 | 4.34 | 171 |
| 68 | 380 | 189 | 52.2 | 40.8 | 4.82 | 185 |
| 69 | 310 | 211 | 54.6 | 42.4 | 4.55 | 179 |
| 70 | 334 | 191 | 55.2 | 43.1 | 4.67 | 165 |
| 71 | 350 | 249 | 55.7 | 40.8 | 4.79 | 183 |
| 72 | 332 | 263 | 54   | 43.7 | 4.67 | 152 |
| 73 | 344 | 224 | 52.3 | 39.6 | 4.42 | 162 |
| 74 | 337 | 258 | 56.1 | 42.5 | 4.83 | 174 |
| 75 | 362 | 228 | 59.7 | 49.6 | 5.44 | 196 |
| 76 | 384 | 241 | 58.6 | 50.4 | 5.52 | 192 |
| 77 | 396 | 210 | 63.1 | 53.9 | 5.82 | 227 |
| 78 | 423 | 233 | 60.7 | 55.1 | 6.12 | 241 |
| 79 | 416 | 183 | 52.4 | 48.3 | 5.9  | 233 |
| 80 | 401 | 235 | 54.6 | 50.6 | 6.12 | 225 |
| 81 | 420 | 244 | 57.3 | 49.6 | 6.05 | 236 |
| 82 | 394 | 214 | 53.1 | 47.8 | 5.98 | 217 |
| 83 | 399 | 188 | 63   | 54.2 | 6.05 | 195 |
| 84 | 437 | 234 | 62.4 | 53.7 | 6.26 | 231 |
| 85 | 416 | 222 | 61.8 | 50.9 | 6.17 | 205 |
| 86 | 448 | 271 | 60.6 | 52.4 | 6.33 | 224 |
| 87 | 441 | 194 | 64.4 | 55.6 | 6.71 | 233 |
| 88 | 437 | 228 | 63.2 | 54.9 | 6.64 | 248 |
| 89 | 472 | 204 | 66.9 | 55.7 | 6.81 | 266 |
| 90 | 452 | 213 | 65.6 | 53.7 | 6.53 | 228 |
| 91 | 477 | 193 | 68.9 | 59.6 | 5.92 | 269 |
| 92 | 481 | 214 | 69.5 | 57.6 | 5.81 | 264 |
| 93 | 493 | 225 | 72.7 | 63.4 | 6.11 | 276 |

|     |     |     |      |      |      |     |
|-----|-----|-----|------|------|------|-----|
| 94  | 463 | 209 | 71.1 | 60.3 | 5.74 | 282 |
| 95  | 495 | 261 | 71.8 | 63.3 | 4.58 | 288 |
| 96  | 512 | 227 | 76.2 | 65.7 | 5.64 | 292 |
| 97  | 527 | 260 | 74.1 | 61.9 | 5.22 | 307 |
| 98  | 480 | 252 | 72.9 | 68.1 | 5.31 | 285 |
| 99  | 426 | 234 | 73.4 | 62.6 | 5.24 | 226 |
| 100 | 436 | 211 | 74.6 | 61.6 | 5.22 | 218 |
| 101 | 423 | 231 | 72.7 | 60.7 | 5.16 | 234 |
| 102 | 442 | 228 | 72.1 | 59.3 | 5.07 | 229 |
| 103 | 424 | 251 | 65.3 | 56.2 | 4.66 | 215 |
| 104 | 455 | 208 | 66.2 | 55.6 | 4.75 | 209 |
| 105 | 432 | 221 | 64.8 | 53.9 | 4.36 | 224 |
| 106 | 413 | 237 | 65.6 | 53.6 | 4.06 | 204 |
| 107 | 401 | 244 | 63.1 | 51.9 | 4.51 | 223 |
| 108 | 391 | 216 | 61.9 | 51.2 | 4.44 | 193 |
| 109 | 412 | 245 | 62.8 | 52.3 | 4.68 | 227 |
| 110 | 395 | 237 | 60.6 | 50.4 | 4.32 | 211 |
| 111 | 388 | 216 | 60.8 | 50.4 | 4.97 | 194 |
| 112 | 394 | 227 | 59.8 | 51.2 | 4.84 | 223 |
| 113 | 381 | 209 | 57.6 | 48.1 | 4.72 | 215 |
| 114 | 346 | 219 | 55.1 | 46.2 | 4.69 | 203 |
| 115 | 281 | 189 | 51.3 | 40.6 | 4.27 | 174 |
| 116 | 248 | 178 | 50.6 | 39.8 | 4.12 | 169 |
| 117 | 294 | 204 | 51.6 | 42.6 | 4.52 | 188 |
| 118 | 303 | 185 | 52.8 | 41.2 | 4.34 | 176 |
| 119 | 323 | 259 | 55.1 | 41.5 | 4.64 | 199 |
| 120 | 336 | 284 | 52.5 | 42.7 | 4.87 | 176 |
| 121 | 314 | 213 | 53.6 | 39.9 | 4.41 | 159 |
| 122 | 355 | 274 | 54.5 | 40.8 | 4.95 | 183 |
| 123 | 365 | 239 | 57.4 | 49.7 | 5.44 | 198 |
| 124 | 381 | 228 | 62.2 | 52.8 | 5.79 | 211 |
| 125 | 401 | 262 | 61   | 54.6 | 5.95 | 234 |
| 126 | 395 | 208 | 53.8 | 48.7 | 5.95 | 212 |
| 127 | 410 | 252 | 57.1 | 51.8 | 6.07 | 231 |
| 128 | 387 | 214 | 59.6 | 48.5 | 6.26 | 252 |
| 129 | 369 | 228 | 55.8 | 45.3 | 6.14 | 224 |
| 130 | 395 | 203 | 67.5 | 56.9 | 6.29 | 201 |
| 131 | 426 | 242 | 66.7 | 52.1 | 6.11 | 245 |
| 132 | 389 | 198 | 60   | 48.6 | 6.34 | 228 |
| 133 | 419 | 228 | 61.5 | 55.6 | 6.21 | 210 |
| 134 | 401 | 222 | 71.8 | 58.4 | 6.3  | 219 |
| 135 | 412 | 240 | 65.4 | 51.6 | 6.75 | 211 |
| 136 | 435 | 185 | 67.8 | 56.4 | 7.02 | 251 |
| 137 | 477 | 217 | 66.5 | 58.2 | 6.49 | 286 |
| 138 | 489 | 221 | 69.5 | 55.3 | 5.88 | 288 |
| 139 | 475 | 236 | 67.9 | 59.4 | 5.7  | 263 |
| 140 | 485 | 255 | 74.3 | 64.7 | 6    | 217 |
| 141 | 474 | 213 | 72.8 | 62.5 | 5.85 | 258 |
| 142 | 470 | 221 | 74.3 | 66.1 | 5.07 | 291 |

|     |     |     |      |      |      |     |
|-----|-----|-----|------|------|------|-----|
| 143 | 485 | 235 | 77.4 | 67.5 | 4.85 | 280 |
| 144 | 502 | 200 | 76.2 | 62.4 | 5.12 | 260 |
| 145 | 530 | 215 | 75.9 | 65.5 | 5.54 | 272 |
| 146 | 416 | 242 | 74.6 | 62.5 | 5.3  | 214 |
| 147 | 457 | 233 | 76.2 | 63.9 | 5.24 | 252 |
| 148 | 441 | 218 | 71.9 | 60.4 | 5.17 | 267 |
| 149 | 465 | 236 | 73.7 | 61.4 | 5.21 | 245 |
| 150 | 434 | 247 | 67.4 | 55.6 | 4.89 | 251 |
| 151 | 461 | 227 | 69.5 | 57.6 | 5.04 | 229 |
| 152 | 455 | 243 | 66.4 | 54.9 | 4.56 | 234 |
| 153 | 425 | 258 | 67.2 | 55.4 | 4.29 | 217 |
| 154 | 406 | 196 | 64.6 | 52.3 | 4.45 | 214 |
| 155 | 394 | 228 | 63.1 | 50.6 | 4.23 | 195 |
| 156 | 401 | 242 | 63.4 | 51.4 | 4.95 | 205 |
| 157 | 416 | 237 | 62.3 | 49.9 | 4.12 | 227 |
| 158 | 379 | 199 | 60.3 | 49.3 | 4.8  | 186 |
| 159 | 402 | 216 | 61.3 | 50.1 | 4.75 | 216 |
| 160 | 396 | 227 | 59.8 | 49.8 | 4.69 | 207 |
| 161 | 354 | 236 | 56.9 | 45.6 | 4.84 | 213 |
| 162 | 277 | 214 | 50.9 | 41.5 | 4.76 | 188 |
| 163 | 252 | 208 | 51.8 | 40.3 | 4.61 | 197 |
| 164 | 273 | 182 | 53.1 | 42.2 | 4.35 | 186 |
| 165 | 287 | 179 | 51.3 | 40.9 | 4.54 | 167 |
| 166 | 327 | 277 | 55.4 | 43.4 | 4.86 | 204 |
| 167 | 296 | 252 | 53.6 | 41.6 | 4.55 | 194 |
| 168 | 331 | 208 | 52.9 | 40.6 | 4.28 | 167 |
| 169 | 317 | 224 | 53.3 | 42.6 | 5.24 | 198 |
| 170 | 355 | 246 | 58.3 | 46.1 | 5.64 | 207 |
| 171 | 309 | 234 | 58.8 | 46.3 | 5.12 | 193 |
| 172 | 328 | 185 | 57.1 | 45.8 | 4.87 | 182 |
| 173 | 384 | 217 | 61.9 | 50.2 | 5.56 | 204 |
| 174 | 378 | 214 | 61.2 | 49.6 | 5.84 | 199 |
| 175 | 417 | 193 | 64   | 52.1 | 6.33 | 234 |
| 176 | 397 | 207 | 62.6 | 50.6 | 6.19 | 247 |
| 177 | 354 | 231 | 60.8 | 48.9 | 5.95 | 189 |
| 178 | 389 | 196 | 70.1 | 58.5 | 6.41 | 204 |
| 179 | 401 | 238 | 69.6 | 57.2 | 6.37 | 226 |
| 180 | 374 | 204 | 61.8 | 50.7 | 6.12 | 208 |
| 181 | 395 | 217 | 64.9 | 53.6 | 5.98 | 191 |
| 182 | 412 | 231 | 73.5 | 62.2 | 6.21 | 223 |
| 183 | 383 | 236 | 68.7 | 57.6 | 6.92 | 197 |
| 184 | 428 | 196 | 69.5 | 58.2 | 7.11 | 248 |
| 185 | 462 | 205 | 70.9 | 59.8 | 6.59 | 271 |
| 186 | 479 | 225 | 68.4 | 58.5 | 5.96 | 281 |
| 187 | 465 | 216 | 69.3 | 59.6 | 5.68 | 227 |
| 188 | 491 | 241 | 77.3 | 63.4 | 6.18 | 262 |
| 189 | 488 | 233 | 75.6 | 61.9 | 5.54 | 276 |
| 190 | 483 | 219 | 76.5 | 67.1 | 5.13 | 280 |
| 191 | 479 | 242 | 77.5 | 66.8 | 4.93 | 275 |

|     |     |     |       |       |      |     |
|-----|-----|-----|-------|-------|------|-----|
| 192 | 495 | 201 | 78.1  | 67.2  | 5.23 | 266 |
| 193 | 517 | 225 | 78.8  | 66.3  | 5.72 | 284 |
| 194 | 551 | 239 | 78.1  | 67.8  | 5.64 | 305 |
| 195 | 535 | 218 | 78.7  | 68.1  | 5.81 | 292 |
| 196 | 467 | 271 | 77.8  | 66.5  | 4.91 | 289 |
| 197 | 482 | 255 | 79.8  | 67.4  | 5.06 | 273 |
| 198 | 452 | 233 | 77.1  | 64.2  | 5.98 | 276 |
| 199 | 521 | 231 | 77.9  | 66.2  | 5.94 | 288 |
| 200 | 479 | 244 | 75.8  | 63.5  | 3.99 | 251 |
| 201 | 432 | 278 | 79.5  | 62.1  | 4.17 | 212 |
| 202 | 395 | 197 | 68.8  | 55.7  | 4.12 | 192 |
| 203 | 389 | 240 | 63.8  | 52.9  | 3.86 | 179 |
| 204 | 414 | 224 | 68.6  | 55.9  | 3.84 | 232 |
| 205 | 408 | 233 | 64.8  | 54.6  | 3.97 | 219 |
| 206 | 368 | 198 | 52.4  | 49.1  | 4.49 | 179 |
| 207 | 388 | 231 | 51.1  | 50.6  | 4.57 | 182 |
| 208 | 405 | 208 | 53.8  | 52.3  | 4.89 | 199 |
| 209 | 325 | 227 | 55.9  | 51.6  | 4.77 | 202 |
| 210 | 253 | 235 | 47.6  | 44.2  | 4.85 | 194 |
| 211 | 277 | 247 | 51.2  | 47.6  | 4.58 | 185 |
| 212 | 232 | 204 | 49.3  | 40.8  | 4.22 | 163 |
| 213 | 241 | 218 | 44.2  | 40.4  | 4.71 | 154 |
| 214 | 305 | 295 | 57.6  | 45.5  | 5.07 | 194 |
| 215 | 300 | 264 | 58.7  | 40.9  | 4.74 | 184 |
| 216 | 269 | 205 | 52.5  | 39.5  | 4.05 | 152 |
| 217 | 282 | 225 | 48.6  | 42.4  | 5.1  | 212 |
| 218 | 315 | 191 | 60.8  | 45.7  | 5.5  | 165 |
| 219 | 298 | 224 | 61.7  | 47.8  | 4.82 | 185 |
| 220 | 305 | 204 | 52.9  | 42.8  | 5.32 | 190 |
| 221 | 323 | 212 | 57.4  | 44.3  | 5.12 | 185 |
| 222 | 348 | 207 | 55.4  | 43.3  | 5.27 | 193 |
| 223 | 385 | 188 | 60.6  | 45.9  | 6.21 | 217 |
| 224 | 363 | 227 | 55.7  | 43.6  | 5.48 | 222 |
| 225 | 335 | 176 | 51.8  | 40.5  | 5.79 | 178 |
| 226 | 380 | 197 | 70.2  | 59.2  | 6.89 | 242 |
| 227 | 395 | 220 | 68.4  | 52.8  | 7.12 | 251 |
| 228 | 345 | 193 | 63.1  | 45.9  | 6.81 | 212 |
| 229 | 369 | 228 | 65.2  | 48.7  | 6.52 | 185 |
| 230 | 399 | 229 | 71.8  | 57.9  | 7.11 | 196 |
| 231 | 377 | 206 | 70.9  | 58.3  | 7.21 | 178 |
| 232 | 412 | 215 | 67.3  | 55.6  | 7.05 | 224 |
| 233 | 479 | 196 | 70.4  | 58.4  | 7.28 | 252 |
| 234 | 472 | 240 | 67.9  | 50.5  | 7.24 | 255 |
| 235 | 443 | 217 | 65.4  | 48.5  | 6.99 | 231 |
| 236 | 469 | 258 | 73.6  | 51.6  | 7.12 | 249 |
| 237 | 493 | 223 | 71.8  | 52.6  | 7.29 | 271 |
| 238 | 413 | 142 | 58.66 | 45.29 | 5.72 | 204 |
| 239 | 457 | 147 | 56.22 | 47.46 | 5.45 | 221 |
| 240 | 395 | 153 | 59.5  | 48.4  | 5.56 | 206 |

|     |     |     |       |       |      |     |
|-----|-----|-----|-------|-------|------|-----|
| 241 | 423 | 205 | 68.12 | 54.48 | 7.02 | 226 |
| 242 | 452 | 247 | 69.29 | 61.25 | 6.84 | 241 |
| 243 | 489 | 246 | 72.24 | 64.63 | 6.24 | 259 |
| 244 | 423 | 214 | 70.22 | 59.21 | 6.23 | 224 |
| 245 | 485 | 201 | 77.2  | 60.5  | 6.03 | 247 |
| 246 | 434 | 252 | 76.6  | 61.7  | 5.82 | 251 |
| 247 | 514 | 214 | 78.9  | 57.8  | 6.63 | 296 |
| 248 | 481 | 247 | 75.8  | 65.9  | 3.86 | 246 |
| 249 | 385 | 263 | 77.6  | 63.4  | 4.02 | 187 |
| 250 | 401 | 193 | 75.6  | 65.4  | 3.88 | 223 |
| 251 | 323 | 237 | 71.3  | 64.7  | 3.97 | 198 |
| 252 | 456 | 296 | 51.3  | 44.8  | 2.96 | 204 |
| 253 | 474 | 199 | 47.6  | 42.3  | 3.52 | 231 |
| 254 | 412 | 225 | 56.2  | 50.9  | 4.63 | 258 |
| 255 | 406 | 244 | 53.1  | 42.4  | 4.55 | 223 |
| 256 | 310 | 182 | 55.4  | 49.7  | 4.21 | 176 |
| 257 | 287 | 214 | 52.6  | 48.9  | 5.72 | 162 |
| 258 | 239 | 211 | 49.5  | 40.5  | 4.12 | 151 |
| 259 | 285 | 232 | 50.6  | 41.4  | 4.27 | 169 |
| 260 | 261 | 196 | 49.3  | 46.2  | 4.69 | 171 |
| 261 | 211 | 236 | 47.7  | 43.5  | 5.12 | 182 |
| 262 | 288 | 256 | 61.7  | 42.8  | 5.19 | 161 |
| 263 | 309 | 239 | 57.1  | 39.3  | 3.28 | 152 |
| 264 | 257 | 181 | 55.9  | 41.7  | 4.67 | 128 |
| 265 | 263 | 230 | 49.5  | 46.4  | 5.25 | 235 |
| 266 | 290 | 177 | 61.7  | 47.2  | 5.32 | 157 |
| 267 | 330 | 214 | 58.7  | 48.8  | 4.71 | 189 |
| 268 | 274 | 214 | 54.9  | 45.8  | 5.22 | 196 |
| 269 | 307 | 252 | 56.1  | 44.5  | 4.62 | 171 |
| 270 | 396 | 182 | 67.31 | 46.8  | 6.14 | 231 |
| 271 | 362 | 231 | 69.12 | 41.8  | 5.45 | 220 |
| 272 | 315 | 198 | 56.12 | 46.9  | 4.85 | 168 |
| 273 | 341 | 204 | 49.37 | 39.7  | 5.12 | 192 |
| 274 | 392 | 204 | 71.52 | 57.88 | 6.98 | 176 |
| 275 | 368 | 234 | 72.64 | 43.8  | 5.99 | 196 |
| 276 | 462 | 207 | 69.13 | 59.8  | 7.07 | 285 |
| 277 | 336 | 184 | 53.2  | 41.5  | 6.89 | 274 |
| 278 | 392 | 204 | 74.45 | 57.88 | 6.98 | 176 |
| 279 | 363 | 182 | 72.64 | 59.33 | 7.28 | 150 |
| 280 | 478 | 197 | 79.86 | 61.42 | 7.23 | 282 |
| 281 | 409 | 214 | 67.34 | 55.67 | 7.17 | 231 |
| 282 | 492 | 224 | 72.55 | 53.18 | 7.38 | 276 |
| 283 | 463 | 215 | 74.21 | 49.13 | 7.23 | 250 |
| 284 | 468 | 223 | 75.61 | 50.34 | 7.01 | 257 |
| 285 | 477 | 212 | 74.01 | 51.16 | 7.34 | 269 |
| 286 | 496 | 204 | 79.37 | 54.03 | 7.24 | 288 |
| 287 | 512 | 187 | 80.32 | 55.64 | 7.35 | 296 |
| 288 | 504 | 165 | 74.44 | 56.32 | 7.61 | 276 |
| 289 | 475 | 194 | 65.02 | 47.31 | 6.94 | 263 |

|     |     |     |       |       |      |     |
|-----|-----|-----|-------|-------|------|-----|
| 290 | 411 | 180 | 64.23 | 48.12 | 6.84 | 207 |
| 291 | 427 | 201 | 78.52 | 57.93 | 7.43 | 213 |
| 292 | 491 | 249 | 81.22 | 62.37 | 7.61 | 273 |
| 293 | 485 | 204 | 80.36 | 64.14 | 7.55 | 286 |
| 294 | 445 | 248 | 72.32 | 54.62 | 6.87 | 244 |
| 295 | 475 | 211 | 70.35 | 51.23 | 6.05 | 237 |
| 296 | 412 | 241 | 81.02 | 65.31 | 7.98 | 222 |
| 297 | 491 | 255 | 76.22 | 54.61 | 7.03 | 263 |
| 298 | 482 | 216 | 70.25 | 54.33 | 7.94 | 247 |
| 299 | 475 | 261 | 73.23 | 57.34 | 7.61 | 265 |
| 300 | 512 | 244 | 76.24 | 58.64 | 7.88 | 281 |
| 301 | 532 | 248 | 80.23 | 62.56 | 8.24 | 307 |
| 302 | 546 | 259 | 84.03 | 60.44 | 8.65 | 312 |
| 303 | 467 | 225 | 70.02 | 49.25 | 7.39 | 251 |
| 304 | 416 | 201 | 69.25 | 48.54 | 7.94 | 212 |
| 305 | 498 | 246 | 68.23 | 45.69 | 8.24 | 295 |
| 306 | 477 | 253 | 70.22 | 55.79 | 7.62 | 287 |
| 307 | 512 | 214 | 75.01 | 52.36 | 7.14 | 305 |
| 308 | 482 | 222 | 78.36 | 54.23 | 8.02 | 274 |
| 309 | 452 | 251 | 74.22 | 51.03 | 7.35 | 224 |
| 310 | 477 | 203 | 69.54 | 47.69 | 6.28 | 261 |
| 311 | 481 | 238 | 68.84 | 45.35 | 6.33 | 274 |
| 312 | 504 | 268 | 74.35 | 51.23 | 7.02 | 290 |
| 313 | 514 | 286 | 78.22 | 55.64 | 7.38 | 308 |
| 314 | 476 | 215 | 74.66 | 54.68 | 7.09 | 246 |
| 315 | 423 | 205 | 69.18 | 48.37 | 6.35 | 212 |
| 316 | 497 | 230 | 72.22 | 59.42 | 7.94 | 241 |
| 317 | 462 | 242 | 75.21 | 60.12 | 6.28 | 234 |
| 318 | 507 | 287 | 70.37 | 57.65 | 7.54 | 294 |
| 319 | 479 | 211 | 69.41 | 45.44 | 7.06 | 276 |
| 320 | 466 | 205 | 68.28 | 50.03 | 6.57 | 247 |
| 321 | 457 | 223 | 74.11 | 51.32 | 7.54 | 221 |
| 322 | 422 | 180 | 68.02 | 41.59 | 7.01 | 204 |
| 323 | 487 | 253 | 71.06 | 57.21 | 7.64 | 271 |
| 324 | 472 | 246 | 74.29 | 54.16 | 7.37 | 268 |
| 325 | 451 | 236 | 75.32 | 59.52 | 7.66 | 244 |
| 326 | 499 | 248 | 63.71 | 40.23 | 6.87 | 237 |
| 327 | 401 | 213 | 65.47 | 39.54 | 7.13 | 214 |
| 328 | 476 | 209 | 68.33 | 40.35 | 6.11 | 284 |
| 329 | 423 | 243 | 65.38 | 42.67 | 7.35 | 241 |
| 330 | 468 | 213 | 70.32 | 53.98 | 5.23 | 250 |
| 331 | 453 | 210 | 76.54 | 51.55 | 6.97 | 241 |
| 332 | 502 | 223 | 75.21 | 45.21 | 7.54 | 297 |
| 333 | 475 | 201 | 72.34 | 49.41 | 7.02 | 255 |
| 334 | 451 | 205 | 74.56 | 48.56 | 7.05 | 207 |
| 335 | 482 | 284 | 80.12 | 55.32 | 6.84 | 271 |
| 336 | 461 | 213 | 70.39 | 62.62 | 7.01 | 264 |
| 337 | 498 | 243 | 75.61 | 54.4  | 5.31 | 289 |
| 338 | 460 | 204 | 70.35 | 48.65 | 6.33 | 274 |



|     |     |     |       |       |      |     |
|-----|-----|-----|-------|-------|------|-----|
| 339 | 432 | 237 | 69.52 | 42.96 | 7.61 | 254 |
| 340 | 495 | 210 | 71.32 | 49.34 | 6.56 | 301 |
| 341 | 480 | 255 | 73.51 | 56.54 | 8.02 | 284 |
| 342 | 463 | 241 | 76.27 | 53.63 | 7.52 | 257 |
| 343 | 497 | 249 | 75.64 | 51.67 | 7.36 | 289 |
| 344 | 468 | 275 | 80.23 | 55.06 | 7.19 | 260 |
| 345 | 462 | 238 | 72.26 | 53.12 | 7.65 | 275 |
| 346 | 482 | 233 | 73.25 | 54.83 | 7.07 | 295 |
| 347 | 462 | 201 | 71.68 | 51.11 | 6.03 | 282 |
| 348 | 443 | 208 | 65.88 | 42.61 | 5.91 | 285 |
| 349 | 492 | 245 | 69.21 | 47.35 | 5.96 | 305 |
| 350 | 413 | 216 | 78.27 | 57.53 | 6.64 | 262 |
| 351 | 394 | 274 | 75.23 | 54.67 | 7.09 | 253 |
| 352 | 401 | 231 | 64.64 | 49.23 | 6.12 | 273 |
| 353 | 382 | 213 | 62.74 | 43.69 | 7.02 | 254 |
| 354 | 475 | 265 | 72.39 | 53.16 | 7.34 | 297 |
| 355 | 485 | 273 | 74.28 | 48.84 | 7.13 | 278 |
| 356 | 421 | 234 | 69.24 | 45.19 | 6.32 | 267 |
| 357 | 451 | 271 | 73.16 | 54.37 | 7.21 | 287 |
| 358 | 425 | 268 | 72.55 | 49.27 | 7.64 | 304 |
| 359 | 388 | 248 | 70.32 | 46.65 | 7.17 | 271 |
| 360 | 384 | 210 | 65.29 | 42.34 | 6.97 | 265 |
| 361 | 395 | 284 | 71.52 | 50.03 | 7.24 | 294 |
| 362 | 387 | 241 | 70.13 | 48.21 | 6.17 | 280 |
| 363 | 401 | 258 | 74.22 | 50.64 | 7.02 | 284 |
| 364 | 357 | 230 | 72.33 | 52.35 | 7.67 | 263 |
| 365 | 407 | 248 | 84.25 | 55.2  | 7.54 | 301 |
| 366 | 386 | 240 | 78.21 | 51.23 | 7.95 | 284 |
| 367 | 424 | 264 | 75.91 | 47.64 | 7.37 | 312 |
| 368 | 435 | 294 | 71.33 | 48.43 | 6.72 | 307 |
| 369 | 423 | 285 | 79.11 | 50.05 | 7.54 | 276 |
| 370 | 397 | 242 | 74.71 | 45.17 | 6.42 | 274 |
| 371 | 384 | 195 | 75.12 | 46.13 | 7.51 | 267 |
| 372 | 384 | 213 | 80.22 | 51.03 | 7.09 | 294 |
| 373 | 401 | 237 | 82.58 | 46.57 | 7.34 | 280 |
| 374 | 421 | 274 | 77.23 | 52.44 | 7.26 | 301 |
| 375 | 413 | 287 | 79.28 | 51.56 | 7.07 | 284 |
| 376 | 384 | 216 | 70.25 | 45.11 | 6.49 | 267 |
| 377 | 402 | 243 | 76.27 | 46.51 | 7.43 | 279 |
| 378 | 384 | 201 | 82.34 | 51.44 | 7.19 | 263 |
| 379 | 398 | 261 | 82.17 | 50.34 | 7.56 | 285 |
| 380 | 429 | 248 | 80.31 | 52.37 | 7.02 | 310 |
| 381 | 411 | 257 | 78.21 | 50.55 | 7.37 | 304 |
| 382 | 374 | 216 | 73.52 | 45.67 | 6.27 | 294 |
| 383 | 421 | 286 | 76.31 | 51.29 | 6.97 | 307 |
| 384 | 405 | 302 | 81.22 | 55.31 | 6.44 | 271 |
| 385 | 394 | 261 | 75.27 | 54.65 | 7.84 | 284 |
| 386 | 384 | 270 | 70.54 | 50.32 | 7.32 | 268 |
| 387 | 402 | 285 | 71.3  | 51.7  | 7.58 | 293 |
